# Supplementary material for: Trade-Offs of Escherichia coli Adaptation to an Intracellular Lifestyle in Macrophages
Source: PubMed Central journal article supplement (PMC4709186; doi:10.1371/journal.pone.0146123), 2016-01-11
Supplement: pone.0146123.s004.pdf [file pone.0146123.s004.pdf]

|              | <b>Experimental</b> | <b>Inferred</b> |
|--------------|---------------------|-----------------|
| <b>A YFP</b> | [0.06 - 0.08]       | 0.1             |
| <b>B CFP</b> | [0.10 - 0.12]       | 0.05            |
| <b>C CFP</b> | [0.11 - 0.13]       | 0.11            |
| <b>D YFP</b> | [0.05 - 0.07]       | 0.06            |
| <b>F YFP</b> | [0.05 - 0.09]       | 0.13            |
| <b>G CFP</b> | [0.06 - 0.08]       | 0.12            |
| <b>H YFP</b> | [0.07 - 0.09]       | 0.13            |
| <b>J YFP</b> | [0.06 - 0.08]       | 0.07            |
| <b>K YFP</b> | [0.03 - 0.07]       | 0.14            |
| <b>N CFP</b> | [0.04 - 0.06]       | 0.04            |
| <b>Q YFP</b> | [0.8 - 0.12]        | 0.11            |
| <b>R YFP</b> | [0.05 - 0.07]       | 0.1             |
| <b>S YFP</b> | [0.05 - 0.07]       | 0.15            |
